# Supplementary material for: Quality of Primary Care in England with the Introduction of Pay for Performance
Source: Atypon-hosted journal article supplement (doi:10.1056/nejmsr065990), 2007-07-11
Supplement: nejm_campbell_181sa1.pdf [file nejm_campbell_181sa1.pdf]

## Supplementary Appendix

This appendix has been provided by the authors to give readers additional information about their work.

Supplement to: Campbell S, Reeves D, Kontopantelis E, Middleton E, Sibbald B, Roland M. Quality of primary care in England with the introduction of pay for performance. *N Engl J Med* 2007;357:181-90.

## Quality In Practice (QuIP) generic drug list

### Drugs for angina by British National Formulary section.

#### Beta blockers (section 2.4 in British National Formulary)

Acebutolol  
Atenolol  
Bisoprolol  
Metoprolol  
Propranolol  
Sotalol  
Timolol

#### Nitrates (section 2.6.1 in British National Formulary)

Glyceryl trinitrate  
Isosorbide dinitrate  
Isosorbide mononitrate

#### Calcium blockers (section 2.6.2 in British National Formulary)

Amlodipine  
Diltiazem  
Felodipine  
Nicardipine

#### Potassium channel activators (section 2.6.3 in British National Formulary)

Nicorandil

### 2. Drugs for type 2 diabetes, by British National Formulary chapter.

#### Oral anti-diabetic drugs (British National Formulary 6.1.2.1, 6.1.2.2 and 6.1.2.3)

Chlorpropamide  
Glibenclamide  
Gliclazide  
Glimepiride  
Glipizide  
Tolazamide  
Tolbutamide  
Metformin  
Acarbose  
Repaglinide

**3. Drugs for asthma, by British National Formulary chapter.**

Bronchodilators (British National Formulary 3.1..)

Salbutamol

Terbutaline

Salmeterol

Beclomethasone

Budenoside

Fluticasone

Sodium Cromoglycate

**National Primary Care Research and Development Centre: February 2007**
